# Supplementary material
Source: PubMed Central journal article supplement (PMC3415936)
Supplement: supp_jis325_jis325supp.pdf [file supp_jis325_jis325supp.pdf]

## Supplemental Figure Legends

**Figure S1:** Phylogenetic trees of consensus gp41 viral sequences ( $\geq 10$  reads) derived from 454 pyrosequenced serum baseline (red) and follow-up (blue) samples are shown for intra- (A & B) and inter-subtype (C) superinfection events. All consensus sequences were combined in a joint tree for identification of superinfecting strains as indicated (dashed circle). HIV subtypes A and D are indicated by brackets. Number of repeated sequences represented by each consensus sequence is shown at the end of the consensus identifier. Distance is indicated for each individual tree and samples are grouped with a selection of subtype reference sequences and random sequences from individuals in Rakai (black)(1).
